# Supplementary material for: A Theoretical Study of Organotin Binding in Aromatase
Source: MDPI journal article supplement (doi:10.3390/ijms24108954), 2023-05-18
Supplement: s1 [file s1]

# Supplementary material

## A Theoretical Study of Organotin Binding in Aromatase

Shuming Cheng<sup>1</sup> and Jing Yang<sup>1,\*</sup>

<sup>1</sup>School of Chemical Engineering and Technology, Sun Yat-sen University, Zhuhai Campus, China;  
yangjing25@mail.sysu.edu.cn

\*Correspondence: [yangjing25@mail.sysu.edu.cn](mailto:yangjing25@mail.sysu.edu.cn)

### Supporting Information Content

|                                                                                                                                                                                                                                                                                                                                                                                 |   |
|---------------------------------------------------------------------------------------------------------------------------------------------------------------------------------------------------------------------------------------------------------------------------------------------------------------------------------------------------------------------------------|---|
| <b>Figure S1.</b> Convergence of interaction entropy of TBTOH- and TPTOH-complex. ....                                                                                                                                                                                                                                                                                          | 2 |
| <b>Figure S2.</b> The RMSD of TBTOH-aromatase complex (A), TPTOH-aromatase complex (B), TBTOH (C) and TPTOH (D). ....                                                                                                                                                                                                                                                           | 2 |
| <b>Figure S3.</b> The binding modes of TBTOH (A) and TPTOH (B)(C) with aromatase in the last 70 ns trajectories. The hydrogen bonds are represented by cyan dash, and the donor-acceptor distances are labeled (Å). The $\pi$ - $\pi$ interactions between TPTOH and TRP-224, HEM are presented as yellow dashes. ....                                                          | 2 |
| <b>Figure S4.</b> The binding modes of TBTOH (A)(B) and TPTOH (C) with aromatase in the 3-30 ns trajectories. The hydrogen bonds are represented by cyan dash. The $\pi$ - $\pi$ interactions between TPTOH and TRP-224, HEM are presented as yellow dashes. (A) The dominant binding mode of TBTOH. (B) The unstable binding mode of TBTOH. C: The binding mode of TPTOH. .... | 3 |
| <b>Figure S5.</b> The $\pi$ - $\pi$ interaction distance (A) and dihedral (B) between TPTOH ring- $\alpha$ and HEM-600 as function of time during MD simulation. ....                                                                                                                                                                                                           | 4 |
| <b>Figure S6.</b> The contribution of each binding sites residues to the main components of $\Delta G_{bind}$ : $\Delta E_{gas}$ (A-B), van der Waals contribution (C-D) and $\Delta\Delta G_{PB}$ (E-F). (A, C, E) TBTOH. (B, D, F) TPTOH. ....                                                                                                                                | 5 |
| <b>Table S1.</b> The clustering result of MD trajectory. The number of frames in each cluster was shown in the table below. The cluster 1 to 10 and 13 to 17 correspond to binding mode1 of TBTOH, and cluster 11 and 12 correspond to mode2. ....                                                                                                                              | 6 |
| <b>Table S2.</b> The total SAPT interaction energy between TPTOH and TRP-224 or PHE-221 and its electrostatics, exchange, induction and dispersion components (kJ/mol). ....                                                                                                                                                                                                    | 6 |
| <b>Table S3.</b> The mean value of the short-range organotin-water interaction energy and its Coulomb and van der Waals components (kJ/mol). $\Delta E_{total} = \Delta E_{total} + \Delta E_{water}$ . $\Delta E_{water}$ is the sum of coulomb and van der Waals components of the short-range organotin-water interaction energy. ....                                       | 6 |

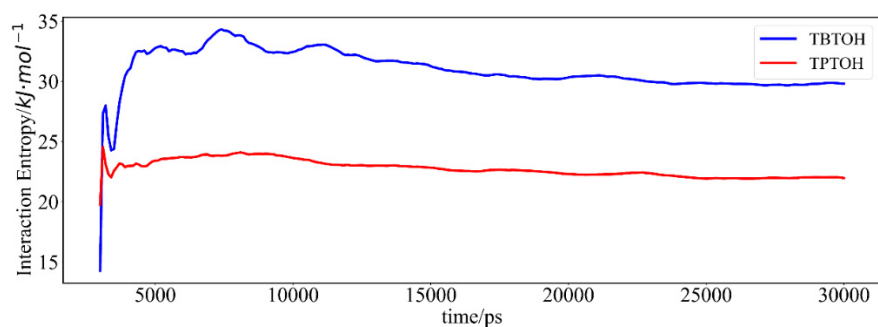

**Figure S1.** Convergence of interaction entropy of TBTOH- and TPTOH-complex.

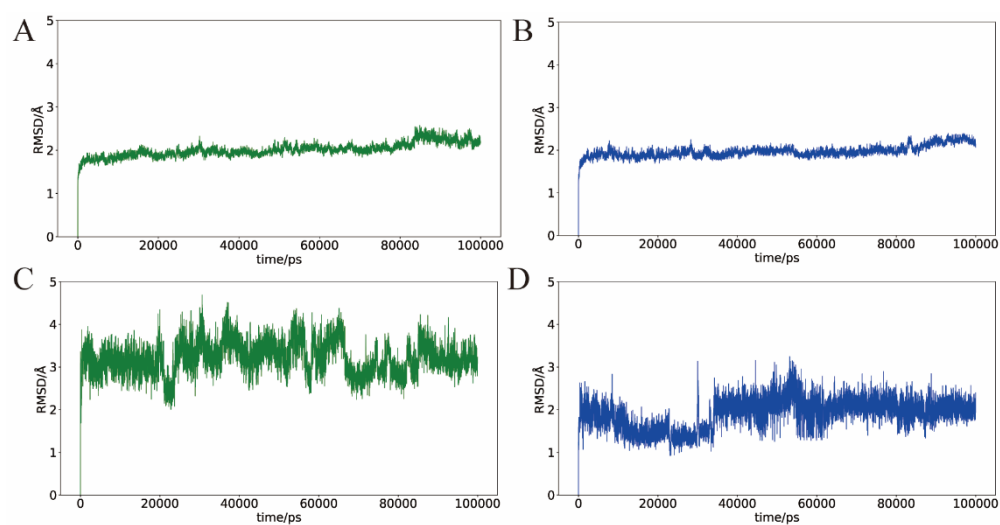

**Figure S2.** The RMSD of TBTOH-aromatase complex (A), TPTOH-aromatase complex (B), TBTOH (C) and TPTOH (D).

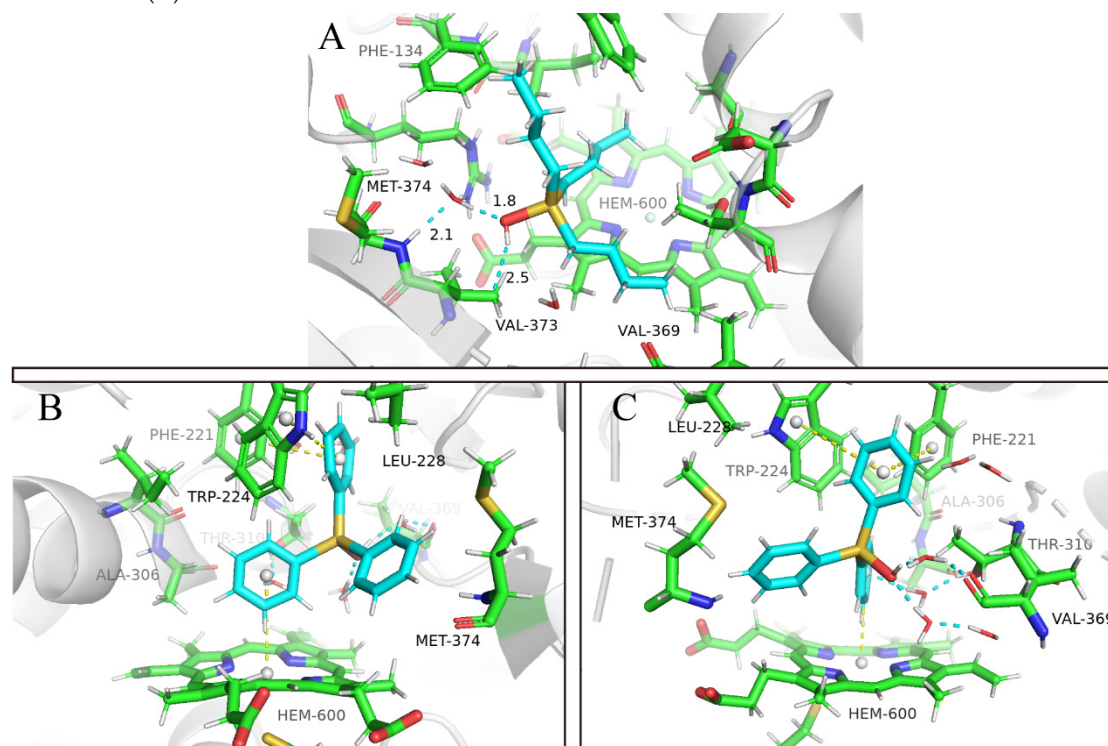

**Figure S3.** The binding modes of TBTOH (A) and TPTOH (B)(C) with aromatase in the last 70 ns

trajectories. The hydrogen bonds are represented by cyan dash, and the donor-acceptor distances are labeled ( $\text{\AA}$ ). The  $\pi$ - $\pi$  interactions between TPTOH and TRP-224, HEM are presented as yellow dashes.

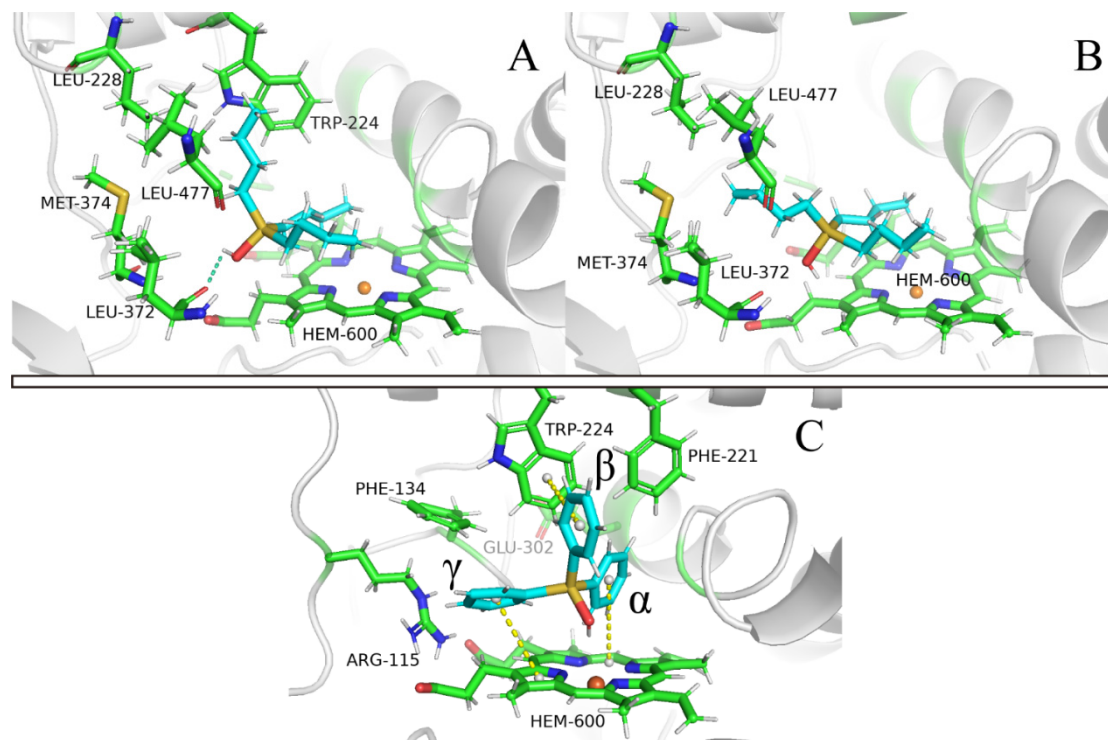

**Figure S4.** The binding modes of TBTOH (A)(B) and TPTOH (C) with aromatase in the 3-30 ns trajectories. The hydrogen bonds are represented by cyan dash. The  $\pi$ - $\pi$  interactions between TPTOH and TRP-224, HEM are presented as yellow dashes. (A) The dominant binding mode of TBTOH. (B) The unstable binding mode of TBTOH. C: The binding mode of TPTOH.

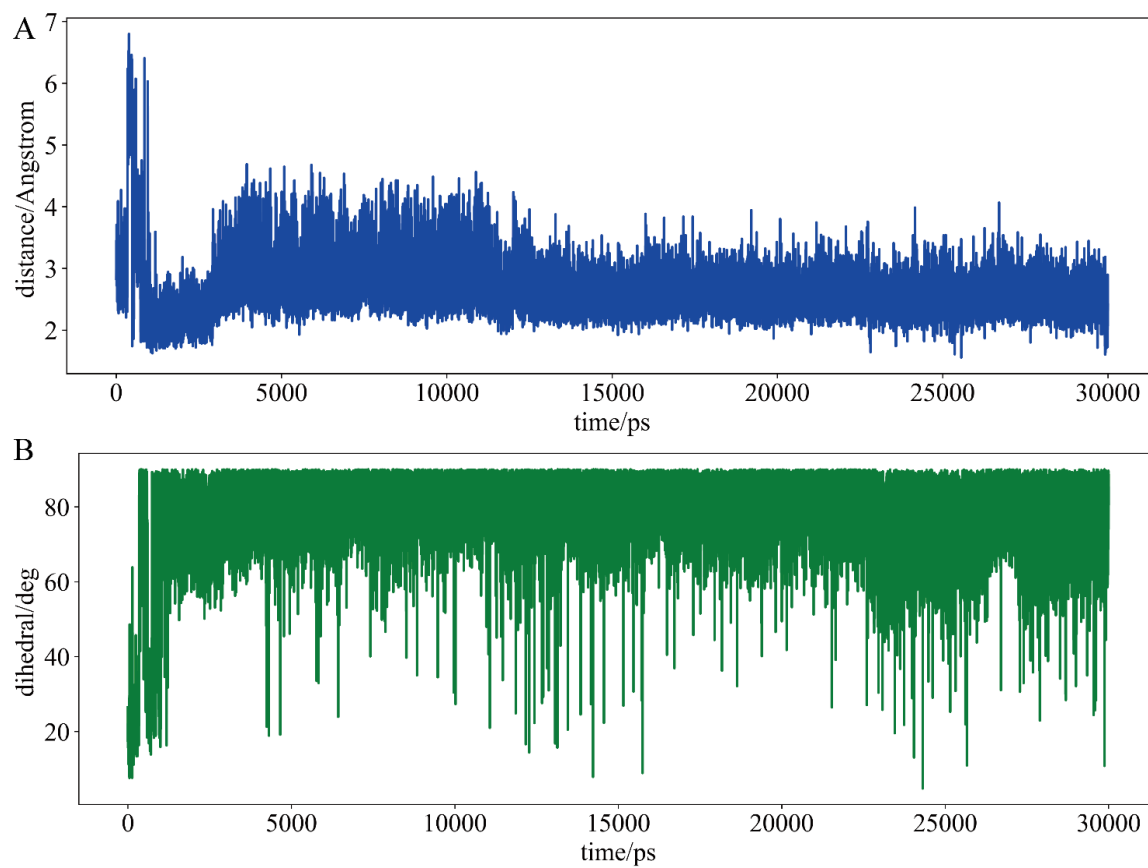

**Figure S5.** The  $\pi$ - $\pi$  interaction distance (A) and dihedral (B) between TPTOH ring- $\alpha$  and HEM-600 as function of time during MD simulation.

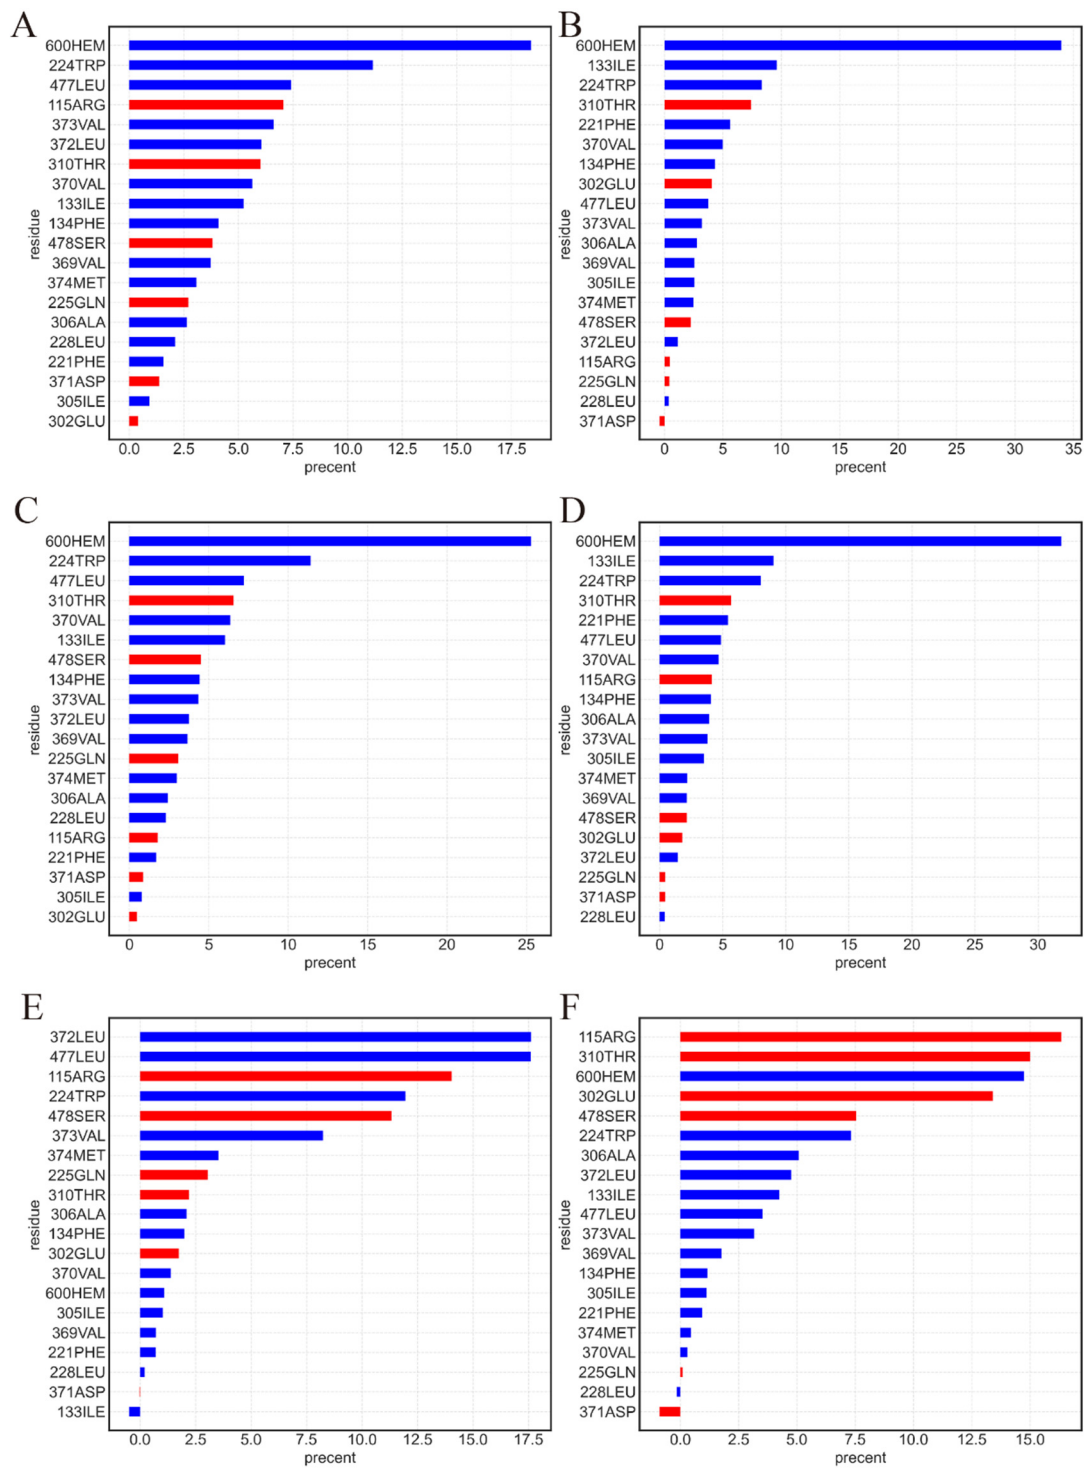

**Figure S6.** The contribution of each binding sites residues to the main components of  $\Delta G_{bind}$ :  $\Delta E_{gas}$  (A-B), van der Waals contribution (C-D) and  $\Delta \Delta G_{PB}$  (E-F). (A, C, E) TBTOH. (B, D, F) TPTOH.

**Table S1.** The clustering result of MD trajectory. The number of frames in each cluster was shown in the table below. The cluster 1 to 10 and 13 to 17 correspond to binding mode1 of TBTOH, and cluster 11 and 12 correspond to mode2.

| Cluster ID | TBTOH | TPTOH |
|------------|-------|-------|
| 1          | 838   | 59    |
| 2          | 2     | 3     |
| 3          | 2     | 407   |
| 4          | 4     | 7     |
| 5          | 218   | 110   |
| 6          | 55    | 37    |
| 7          | 185   | 24    |
| 8          | 48    | 1125  |
| 9          | 7     | 384   |
| 10         | 536   | 503   |
| 11         | 5     | 42    |
| 12         | 105   |       |
| 13         | 155   |       |
| 14         | 228   |       |
| 15         | 145   |       |
| 16         | 133   |       |
| 17         | 35    |       |

**Table S2.** The total SAPT interaction energy between TPTOH and TRP-224 or PHE-221 and its electrostatics, exchange, induction and dispersion components (kJ/mol).

| Residue | Total   | Electrostatics | Exchange | Induction | Dispersion |
|---------|---------|----------------|----------|-----------|------------|
| TRP-224 | -13.949 | -6.104         | 24.660   | -2.424    | -30.081    |
| PHE-221 | -12.247 | -9.373         | 20.977   | -2.644    | -21.207    |

**Table S3.** The mean value of the short-range organotin-water interaction energy and its Coulomb and van der Waals components (kJ/mol).  $\Delta E_{\text{total}} = \Delta E_{\text{total}} + \Delta E_{\text{water}}$ .  $\Delta E_{\text{water}}$  is the sum of coulomb and van der Waals components of the short-range organotin-water interaction energy.

| Ligand | Coulomb | van der Waals | $\Delta E_{\text{gas}}$ | $\Delta E_{\text{total}}$ |
|--------|---------|---------------|-------------------------|---------------------------|
| TBTOH  | -39.332 | -2.234        | -202.424                | -243.990                  |
| TPTOH  | -43.452 | -7.735        | -196.965                | -248.152                  |

### Definition of Bond-Forming Probability

To quantify the stability of hydrogen bonds in terms of structural information, we defined the bond-forming probability using the following equation:

$$P = \frac{N_{hbond}}{N_{tot}}$$

$N_{hbond}$  is the number of frames in which the hydrogen bond forms;  $N_{tot}$  is the total number of frames in a trajectory. We use a criterion that the donor-receptor distance  $d(H\cdots X, X=O \text{ or } N)$  is below 2.5 Å and the hydrogen bond angle is greater than 120° to identify the hydrogen bonding. The bond-forming probability was calculated on the 2701 frames extracted from the 3–30 ns trajectory using the uniform sampling method with a sampling interval of 10 ps.
